# Supplementary material for: Processing and Characterization of UV Irradiated HDPE/POSS Fibers
Source: MDPI journal article supplement (doi:10.3390/nano13243131), 2023-12-13
Supplement: s1 [file s1]

# Processing and Characterization of UV Irradiated HDPE/POSS Fibers

Ezgi Biçer <sup>1</sup>, Mehmet Kodal <sup>1,2,\*</sup> and Güralp Özkoç <sup>2,3,4</sup>

<sup>1</sup> Department of Chemical Engineering, Kocaeli University, 41001, Kocaeli, Turkey; ezgibicer39@gmail.com (E.B.); mehmet.kodal@kocaeli.edu.tr (M.K.)

<sup>2</sup> Nanotechnology Research and Application Center, Sabancı University, 34956, Istanbul, Turkey; guralp.ozkoc@istinye.edu.tr

<sup>3</sup> Department of Chemistry, Istinye University, 34396, Istanbul, Turkey

<sup>4</sup> Xplore Instruments B.V., 6135 KT, Sittard, The Netherlands

\* Correspondence: mehmet.kodal@kocaeli.edu.tr, Tel.: +902623033540

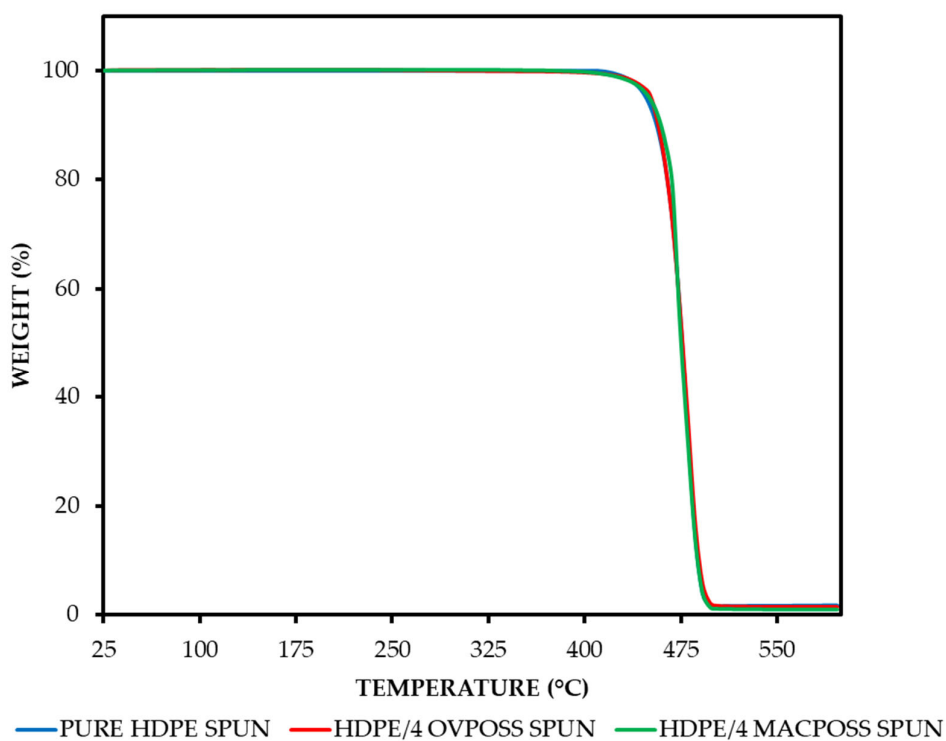

**Figure S1.** TGA curves of the spun HDPE and HDPE/POSS fibers.

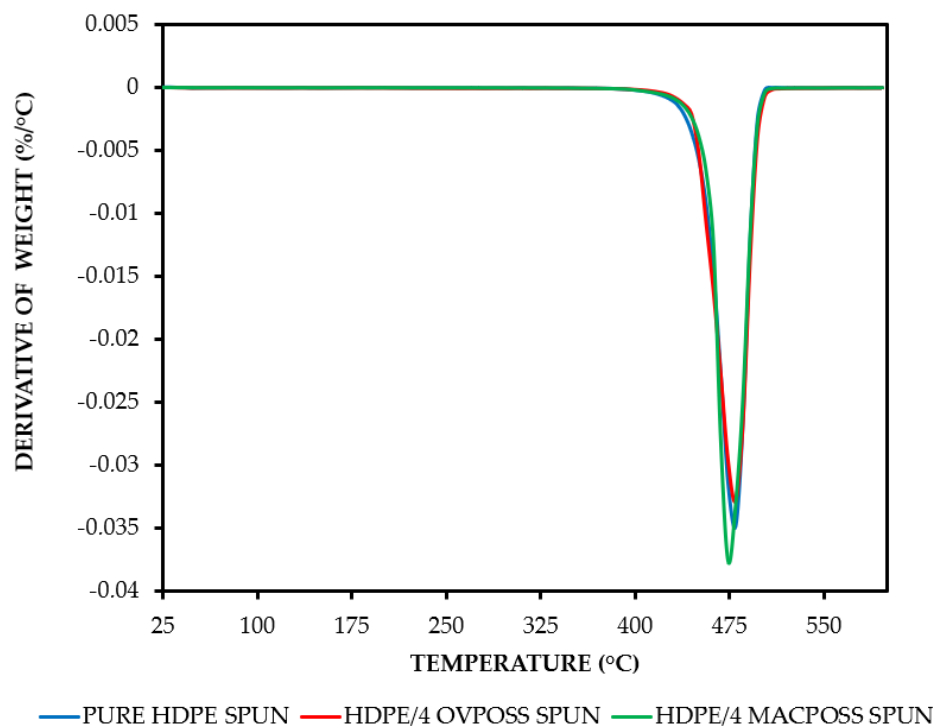

**Figure S2.** Derivative weight of the spun HDPE and HDPE/POSS fibers.

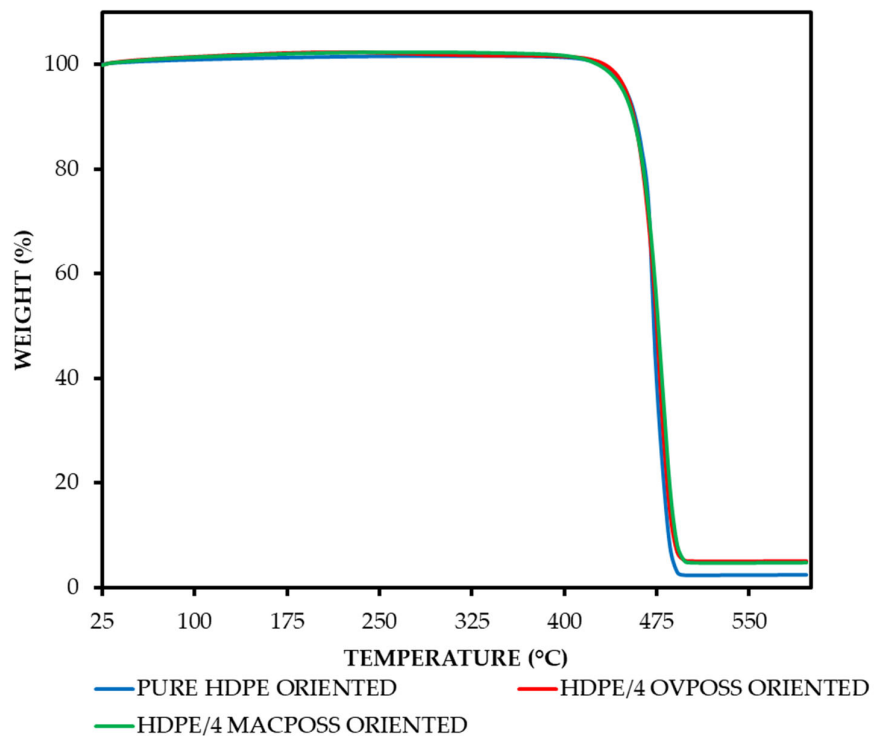

**Figure S3.** TGA curves of the oriented HDPE and HDPE/POSS fibers.

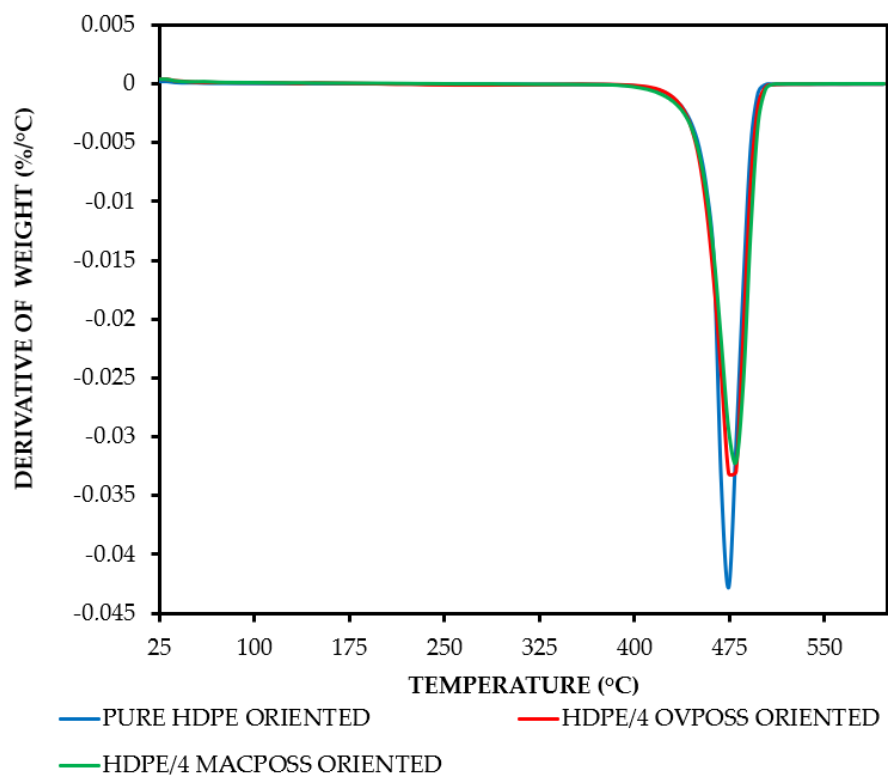

**Figure S4.** Derivative weight of the oriented HDPE and HDPE/POSS fibers.

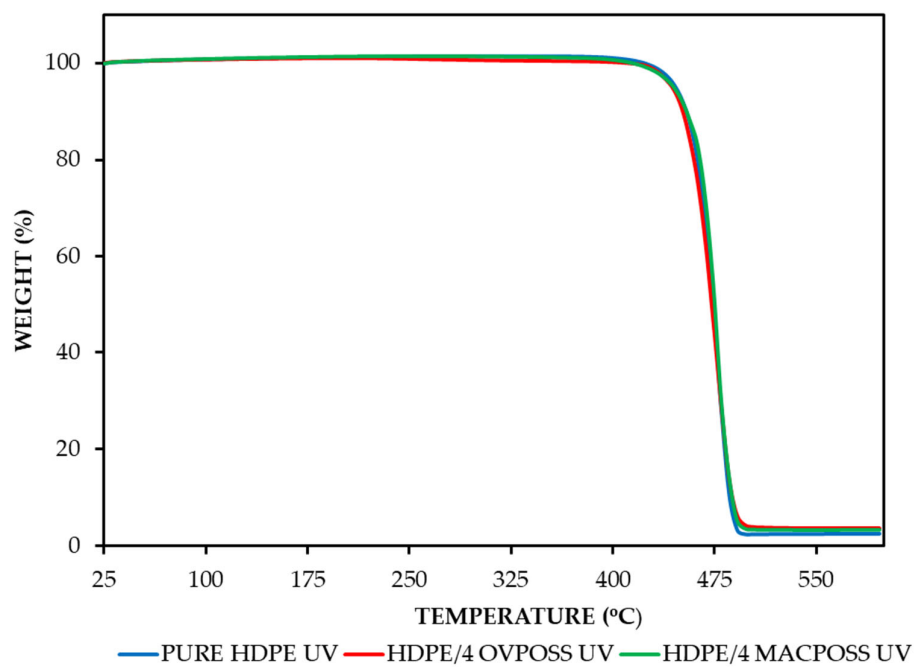

**Figure S5.** TGA curves of the oriented HDPE and HDPE/POSS fibers after UV.

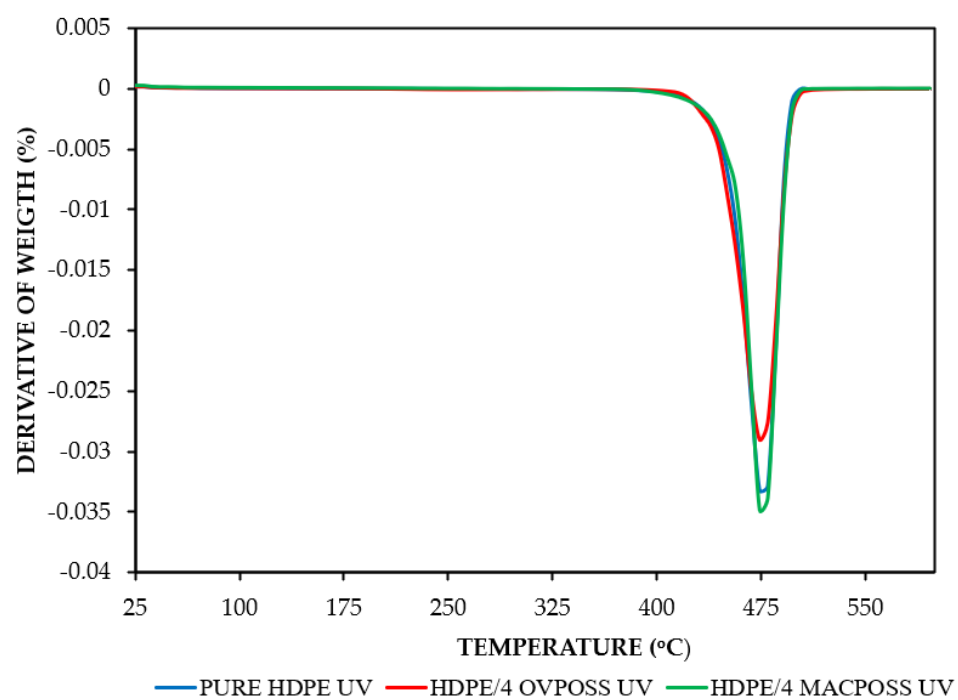

**Figure S6.** Derivative weight of the oriented HDPE and HDPE/POSS fibers after UV.
